# Supplementary material for: Genomic and Phenomic Study of Mammary Pathogenic Escherichia coli
Source: PLoS One. 2015 Sep 1;10(9):e0136387. doi: 10.1371/journal.pone.0136387 (PMC4556653; doi:10.1371/journal.pone.0136387)
Supplement: S3 Dataset — (XLSX) [file pone.0136387.s003.xlsx]

## Sheet: Sheet1
Strain	Pathotype, serotype, MLST	Accesion n.	Reference	VL2874					VL2732					P4					K71
				DDH	Model C.I.	Bootstrap C.I.	Distance	Prob. DDH >= 70%	DDH	Model C.I.	Bootstrap C.I.	Distance	Prob. DDH >= 70%	DDH	Model C.I.	Bootstrap C.I.	Distance	Prob. DDH >= 70%	DDH	Model C.I.	Bootstrap C.I.	Distance	Prob. DDH >= 70%
E. coli VL2874	mastitis, ST10	JTFE00000000	this study						98.3	1.63134	98.3 - 98.3%	0.0027	97.91	98	1.69057	98 - 98%	0.0031	97.85	86.6	2.63542	86.6 - 86.6%	0.0159	94.47
E. coli VL2732	mastitis, ST10	JTFD00000000	this study	98.3	1.63134	98.3 - 98.3%	0.0027	97.91						97.9	1.87212	97.9 - 97.9%	0.0032	97.84	86.8	2.93389	86.8 - 86.8%	0.0156	94.57
E. coli P4	mastitis, ST10	AJQW00000000	1	98	1.69057	98 - 98%	0.0031	97.85	97.9	1.87212	97.9 - 97.9%	0.0032	97.84						86.7	2.60418	86.7 - 86.8%	0.0157	94.55
E. coli str. K-12 W3110	Commensal, ST10	AP009048	2	97.4	1.59558	97.4 - 97.4%	0.0039	97.72	97.9	1.27706	97.9 - 97.9%	0.0032	97.84	98	1.75812	98 - 98%	0.003	97.86	87.1	2.83637	87.1 - 87.1%	0.0152	94.72
E. coli str. K-12 MG1655	Commensal, ST10	U00096	2	97.4	1.59556	97.3 - 97.4%	0.0039	97.72	97.9	1.28204	97.9 - 97.9%	0.0032	97.84	98	1.7476	98 - 98.1%	0.003	97.87	87.2	2.84785	87.2 - 87.2%	0.0152	94.73
E. coli IAI1	Commensal, O8, ST1128	CU928160	3	87.5	2.45207	87.5 - 87.5%	0.0148	94.87	87.4	2.30065	87.4 - 87.4%	0.015	94.82	87.7	2.60133	87.7 - 87.7%	0.0147	94.93	93.3	2.07395	93.3 - 93.3%	0.0086	96.77
E. coli 53638	EIEC, O144, ST6	AAKB02000001 AAKB02000002	4	91.5	2.59926	91.5 - 91.5%	0.0104	96.29	92.2	2.68149	92.2 - 92.2%	0.0097	96.48	92	2.8874	92 - 92%	0.01	96.41	85.9	2.96522	85.9 - 85.9%	0.0166	94.17
E. coli UMNK88	ETEC, ST100	CP002729 CP002730 CP002731 CP002732 CP002733	5	91.8	2.91847	91.8 - 91.8%	0.0101	96.37	92.8	2.96376	92.8 - 92.8%	0.0091	96.64	92.3	2.89109	92.3 - 92.4%	0.0096	96.52	85.8	3.16077	85.8 - 85.8%	0.0167	94.13
E. coli E24377A	ETEC, O139:H28, ST1132	CP000800 CP000796 CP000797 CP000798 CP000799 CP000801 CP000795	4	86.3	2.87725	86.3 - 86.3%	0.0162	94.35	86.7	2.87932	86.7 - 86.7%	0.0158	94.52	86.1	2.98206	86.1 - 86.2%	0.0163	94.28	91.5	2.85364	91.5 - 91.5%	0.0105	96.27
S. flexneri 2a 2457T	Dysentery, Serogroup 2a, ST245	AE014073	6	84.9	3.24051	84.9 - 84.9%	0.0177	93.7	85.4	3.18633	85.4 - 85.4%	0.0171	93.94	84.6	3.30761	84.6 - 84.6%	0.018	93.53	85.3	3.31645	85.3 - 85.3%	0.0173	93.88
S. boydii CDC 3083-94	Dysentery, Serogroup 1, ST1129	CP001063 CP001059 CP001060 CP001062 CP001061 CP001058	7	84.5	3.32729	84.5 - 84.5%	0.0182	93.45	84.6	3.32808	84.6 - 84.6%	0.0181	93.51	84.5	3.34639	84.5 - 84.5%	0.0182	93.46	86.8	3.33683	86.8 - 86.9%	0.0156	94.59
S. sonnei Ss046	Dysentery, ST152	CP000038 CP000039 CP000641 CP000642 CP000643	8	85.9	3.2366	85.9 - 86%	0.0166	94.19	86.2	3.20825	86.2 - 86.2%	0.0163	94.32	84.5	3.31238	84.5 - 84.5%	0.0182	93.47	88	3.31214	88 - 88%	0.0143	95.08
S. dysenteriae Sd197	Dysentery, Serogroup 1, ST146	CP000034 CP000640 CP000035	8	82	3.33519	82 - 82%	0.021	91.99	82.3	3.34689	82.3 - 82.3%	0.0206	92.22	80.7	3.3024	80.7 - 80.7%	0.0225	91.12	81.5	3.26078	81.5 - 81.5%	0.0216	91.68
E. coli K71	environmental, non-mastitis pathogenic, ST58	JTFF00000000	this study	86.6	2.63542	86.6 - 86.6%	0.0159	94.47	86.8	2.93389	86.8 - 86.8%	0.0156	94.57	86.7	2.60418	86.7 - 86.8%	0.0157	94.55
E. coli 55989	EAEC, ST678	CU928145	3	86.4	2.977	86.4 - 86.4%	0.0161	94.38	87	2.80752	87 - 87%	0.0154	94.64	86.8	3.0174	86.8 - 86.8%	0.0156	94.58	91.6	2.70138	91.6 - 91.6%	0.0104	96.31
E. coli str. 2011C-3493	EHEC/EAEC, O104:H4 , ST678	CP003289.1 CP003291.1 CP003290.1 CP003292.1	9	86.1	3.1516	86.1 - 86.1%	0.0164	94.27	86.9	3.06855	86.9 - 86.9%	0.0155	94.61	86.4	3.15089	86.4 - 86.4%	0.0161	94.38	91.6	2.9253	91.6 - 91.6%	0.0104	96.31
E. coli str. EDL933	EHEC, O157:H7 , ST11	AE005174 AF074613	10	81.5	3.33212	81.5 - 81.5%	0.0216	91.68	82	3.31329	82 - 82%	0.0211	91.99	81.2	3.33164	81.2 - 81.2%	0.0219	91.47	79.9	3.33726	79.9 - 79.9%	0.0234	90.54
E. coli Sakai	EHEC, O157:H7, ST11	BA000007 AB011549 AB011548	11	81.8	3.32851	81.8 - 81.8%	0.0213	91.87	82.4	3.30924	82.4 - 82.4%	0.0206	92.24	81.7	3.32978	81.6 - 81.7%	0.0214	91.78	80.4	3.33151	80.4 - 80.4%	0.0229	90.87
E. coli E22	EPEC, 0157:H7 , ST20	AAJV00000000	JCVI	86.1	3.22113	86.1 - 86.1%	0.0164	94.27	86	3.24331	86 - 86%	0.0165	94.22	86.1	3.22273	86.1 - 86.1%	0.0164	94.26	90.2	2.96761	90.2 - 90.2%	0.0119	95.86
E. coli E2348/69	EPEC, O127:H6, ST15	FM180568 FM180569 FM180570	12	74	3.34895	74 - 74%	0.0308	84.47	74.5	3.3486	74.5 - 74.5%	0.0301	85.12	74.2	3.34761	74.2 - 74.2%	0.0305	84.76	73.3	3.34785	73.3 - 73.3%	0.0317	83.51
E. coli str. NRG 857C	AIEC, O83:H1 , ST135	CP001855 CP001856	13	74.5	3.33128	74.5 - 74.5%	0.0301	85.18	75	3.30766	75 - 75%	0.0295	85.71	74.5	3.34468	74.5 - 74.5%	0.0301	85.18	73.7	3.34888	73.7 - 73.7%	0.0311	84.14
E. coli APEC O78	APEC, O78, ST23	CP004009.1	14	87.7	2.24465	87.7 - 87.7%	0.0146	94.96	87.6	2.18449	87.6 - 87.6%	0.0147	94.92	87.7	2.25474	87.7 - 87.7%	0.0146	94.95	91.1	2.52167	91.1 - 91.1%	0.0109	96.15
E. coli APECO1	APEC, O1:K1:H7, ST95	CP000468 DQ517526 DQ381420	15	74.3	3.34602	74.2 - 74.3%	0.0304	84.83	74.6	3.34729	74.6 - 74.6%	0.03	85.29	74.1	3.345	74.1 - 74.1%	0.0307	84.6	72.7	3.34077	72.7 - 72.7%	0.0325	82.68
E. coli S88	ExPEC, O45:K1:H7, ST95	CU928161 CU928146	3	74.8	3.33967	74.8 - 74.8%	0.0297	85.54	75.2	3.32132	75.2 - 75.2%	0.0292	85.99	74.7	3.33026	74.7 - 74.7%	0.0299	85.34	73.2	3.34549	73.2 - 73.2%	0.0318	83.4
E. coli IAI39	UPEC, O7:K1, ST62	CU928164	3	77.2	3.32398	77.2 - 77.2%	0.0267	88.15	77.5	3.2267	77.5 - 77.5%	0.0263	88.46	77.3	3.33991	77.3 - 77.3%	0.0266	88.22	75.9	3.34476	75.9 - 75.9%	0.0283	86.81
E. coli UMN026	UPEC, O7:K1, ST597	CU928163 CU928148 CU928149	3	78	3.27602	78 - 78%	0.0258	88.87	78.4	3.27097	78.4 - 78.4%	0.0253	89.22	77.6	3.2741	77.6 - 77.6%	0.0262	88.54	76.5	3.3017	76.4 - 76.5%	0.0276	87.38
E. coli F11	ExPEC, O6:H31, ST127	AAJU00000000	4	74.1	3.34886	74.1 - 74.1%	0.0306	84.62	74.8	3.3478	74.8 - 74.8%	0.0297	85.5	73.9	3.34827	73.9 - 73.9%	0.0309	84.38	73	3.34897	73 - 73%	0.032	83.2
E. coli UTI89	UPEC, ST95	CP000243 CP000244	16	74	3.347	74 - 74%	0.0307	84.51	74.7	3.34438	74.7 - 74.7%	0.0299	85.37	73.7	3.34555	73.7 - 73.7%	0.0312	84.09	72.7	3.34867	72.7 - 72.7%	0.0324	82.77
E. coli ABU 83972	UPEC, ST73	CP001671 CP001833	17	74.2	3.34899	74.2 - 74.2%	0.0305	84.71	74.7	3.34289	74.7 - 74.7%	0.0298	85.39	74.3	3.34854	74.3 - 74.3%	0.0304	84.86	73.8	3.33999	73.8 - 73.8%	0.031	84.28
E. coli ST131 str. EC958	UPEC, O25b:H4, ST131	CAFL00000000	18	74.7	3.34394	74.7 - 74.7%	0.0299	85.33	74.9	3.3428	74.9 - 74.9%	0.0295	85.68	74.3	3.34795	74.3 - 74.3%	0.0304	84.84	74.1	3.3489	74.1 - 74.1%	0.0306	84.65
E. coli 536	UPEC, O6:K15:H31, ST127	CP000247	19	74.4	3.34088	74.4 - 74.4%	0.0303	84.97	74.8	3.31757	74.8 - 74.8%	0.0297	85.51	74.2	3.34237	74.2 - 74.2%	0.0305	84.79	73.6	3.34851	73.6 - 73.6%	0.0313	83.95
E. coli CFT073	UPEC, O6:K2:H1, ST73	AE014075	20	74.3	3.34696	74.3 - 74.3%	0.0303	84.91	74.5	3.342	74.5 - 74.5%	0.0301	85.17	74.1	3.34899	74.1 - 74.1%	0.0306	84.66	73.7	3.34008	73.7 - 73.7%	0.0311	84.12
E. fergusonii ATCC 35469	Commensal, na	CU928158 CU928144	3	40.7	3.04193	40.7 - 40.7%	0.097	3.25	40.7	3.04562	40.7 - 40.7%	0.0972	3.2	40.8	3.04841	40.8 - 40.9%	0.0966	3.34	40.7	3.03086	40.7 - 40.7%	0.0971	3.24
1	Blum S, Sela N, Heller ED, Sela S, Leitner G. 2012. Genome analysis of bovine-mastitis-associated Escherichia coli O32:H37 strain P4. J. Bacteriol. 194:3732.
2	Hayashi K, Morooka N, Yamamoto Y, Fujita K, Isono K, Choi S, Ohtsubo E, Baba T, Wanner BL, Mori H, Horiuchi T. 2006. Highly accurate genome sequences of Escherichia coli K-12 strains MG1655 and W3110. Mol. Syst. Biol. 2:2006.0007.
3	Genoscope
4	TIGR
5	Shepard SM, Danzeisen JL, Isaacson RE, Seemann T, Achtman M, Johnson TJ. 2012. Genome sequences and phylogenetic analysis of K88- and F18-positive porcine enterotoxigenic Escherichia coli. J. Bacteriol. 194:395–405.
6	Wei J, Goldberg MB, Burland V, Venkatesan MM, Deng W, Fournier G, Mayhew GF, Plunkett G, Rose DJ, Darling A, Mau B, Perna NT, Payne SM, Runyen-Janecky LJ, Zhou S, Schwartz DC, Blattner FR. 2003. Complete genome sequence and comparative genomics of Shigella flexneri serotype 2a strain 2457T. Infect. Immun. 71:2775–86.
7	JCVI
8	Yang F, Yang J, Zhang X, Chen L, Jiang Y, Yan Y, Tang X, Wang J, Xiong Z, Dong J, Xue Y, Zhu Y, Xu X, Sun L, Chen S, Nie H, Peng J, Xu J, Wang Y, Yuan Z, Wen Y, Yao Z, Shen Y, Qiang B, Hou Y, Yu J, Jin Q. 2005. Genome dynamics and diversity of Shigella species, the etiologic agents of bacillary dysentery. Nucleic Acids Res. 33:6445–58.
9	Ahmed SA, Awosika J, Baldwin C, Bishop-Lilly KA, Biswas B, Broomall S, Chain PSG, Chertkov O, Chokoshvili O, Coyne S, Davenport K, Detter JC, Dorman W, Erkkila TH, Folster JP, Frey KG, George M, Gleasner C, Henry M, Hill KK, Hubbard K, Insalaco J, Johnson S, Kitzmiller A, Krepps M, Lo C-C, Luu T, McNew LA, Minogue T, Munk CA, Osborne B, Patel M, Reitenga KG, Rosenzweig CN, Shea A, Shen X, Strockb…
10	Perna NT, Plunkett G, Burland V, Mau B, Glasner JD, Rose DJ, Mayhew GF, Evans PS, Gregor J, Kirkpatrick HA, Pósfai G, Hackett J, Klink S, Boutin A, Shao Y, Miller L, Grotbeck EJ, Davis NW, Lim A, Dimalanta ET, Potamousis KD, Apodaca J, Anantharaman TS, Lin J, Yen G, Schwartz DC, Welch RA, Blattner FR. 2001. Genome sequence of enterohaemorrhagic Escherichia coli O157:H7. Nature 409:529–33.
11	Hayashi T, Makino K, Ohnishi M, Kurokawa K, Ishii K, Yokoyama K, Han CG, Ohtsubo E, Nakayama K, Murata T, Tanaka M, Tobe T, Iida T, Takami H, Honda T, Sasakawa C, Ogasawara N, Yasunaga T, Kuhara S, Shiba T, Hattori M, Shinagawa H. 2001. Complete genome sequence of enterohemorrhagic Escherichia coli O157:H7 and genomic comparison with a laboratory strain K-12. DNA Res. 8:11–22.
12	Iguchi A, Thomson NR, Ogura Y, Saunders D, Ooka T, Henderson IR, Harris D, Asadulghani M, Kurokawa K, Dean P, Kenny B, Quail MA, Thurston S, Dougan G, Hayashi T, Parkhill J, Frankel G. 2009. Complete genome sequence and comparative genome analysis of enteropathogenic Escherichia coli O127:H6 strain E2348/69. J. Bacteriol. 191:347–54.
13	Nash JH, Villegas A, Kropinski AM, Aguilar-Valenzuela R, Konczy P, Mascarenhas M, Ziebell K, Torres AG, Karmali MA, Coombes BK. 2010. Genome sequence of adherent-invasive Escherichia coli and comparative genomic analysis with other E. coli pathotypes. BMC Genomics 11:667.
14	Mangiamele P, Nicholson B, Wannemuehler Y, Seemann T, Logue CM, Li G, Tivendale KA, Nolan LK. Complete genome sequence of the avian pathogenic Escherichia coli strain APEC O78. Genome Announc. 1:e0002613.
15	Johnson TJ, Kariyawasam S, Wannemuehler Y, Mangiamele P, Johnson SJ, Doetkott C, Skyberg JA, Lynne AM, Johnson JR, Nolan LK. 2007. The genome sequence of avian pathogenic Escherichia coli strain O1:K1:H7 shares strong similarities with human extraintestinal pathogenic E. coli genomes. J. Bacteriol. 189:3228–36.
16	Chen SL, Hung C-S, Xu J, Reigstad CS, Magrini V, Sabo A, Blasiar D, Bieri T, Meyer RR, Ozersky P, Armstrong JR, Fulton RS, Latreille JP, Spieth J, Hooton TM, Mardis ER, Hultgren SJ, Gordon JI. 2006. Identification of genes subject to positive selection in uropathogenic strains of Escherichia coli: a comparative genomics approach. Proc. Natl. Acad. Sci. U. S. A. 103:5977–82.
17	Zdziarski J, Brzuszkiewicz E, Wullt B, Liesegang H, Biran D, Voigt B, Grönberg-Hernandez J, Ragnarsdottir B, Hecker M, Ron EZ, Daniel R, Gottschalk G, Hacker J, Svanborg C, Dobrindt U. 2010. Host imprints on bacterial genomes--rapid, divergent evolution in individual patients. PLoS Pathog. 6:e1001078.
18	Totsika M, Beatson SA, Sarkar S, Phan M-D, Petty NK, Bachmann N, Szubert M, Sidjabat HE, Paterson DL, Upton M, Schembri MA. 2011. Insights into a multidrug resistant Escherichia coli pathogen of the globally disseminated ST131 lineage: genome analysis and virulence mechanisms. PLoS One 6:e26578.
19	Hochhut B, Wilde C, Balling G, Middendorf B, Dobrindt U, Brzuszkiewicz E, Gottschalk G, Carniel E, Hacker J. 2006. Role of pathogenicity island-associated integrases in the genome plasticity of uropathogenic Escherichia coli strain 536. Mol. Microbiol. 61:584–95.
20	Welch RA, Burland V, Plunkett G, Redford P, Roesch P, Rasko D, Buckles EL, Liou S-R, Boutin A, Hackett J, Stroud D, Mayhew GF, Rose DJ, Zhou S, Schwartz DC, Perna NT, Mobley HLT, Donnenberg MS, Blattner FR. 2002. Extensive mosaic structure revealed by the complete genome sequence of uropathogenic Escherichia coli. Proc. Natl. Acad. Sci. U. S. A. 99:17020–4.
